# Supplementary material for: Carbon balance and emissions of methane and nitrous oxide during four years of moderate rewetting of a cultivated peat soil site
Source: Copernicus journal article supplement (doi:10.5194/egusphere-2024-934), 2024-04-30
Supplement: Supplementary file 1 [file egusphere-2024-934-supplement.pdf]

**Table S1:** Management of the experimental plots with forage, set-aside or willow treatments in 2018-2023

| Year | Forage                                                                                                                                                                                                                                                                                                   | Set-aside*                                                                       | Willow             |
|------|----------------------------------------------------------------------------------------------------------------------------------------------------------------------------------------------------------------------------------------------------------------------------------------------------------|----------------------------------------------------------------------------------|--------------------|
| 2018 | 2018/6/27 sowing + fertilisation (100 kg N + 13 kg P/ha) with <i>Poa trivialis</i> and <i>Festuca pratensis</i> seeds (50%/50%)                                                                                                                                                                          | 2018/9/6 Planting of bog whortleberry                                            | 2018/6/14 Planting |
| 2019 | 2019/5/15 fertilisation (100 kg N/ha) and spot sowing (15kg/ha) with seed mix of <i>Phleum pratense</i> , <i>Festuca pratensis</i> , <i>Lolium multiflorum</i> and <i>Poa pratensis</i> .<br>2019/5/22 herbicide Ariane S 2 l/ha<br><br>2019/6/7 harvest<br>2019/7/11 harvest<br>2019/9/2 harvest        | 2019/5/7: fertilisation (16 kg N/ha)<br><br>2019/7/31: fertilisation (8 kg N/ha) |                    |
| 2020 | 2020/5/8 fertilisation (100 kg N/ha)<br><br>2020/6/16 harvest + fertilisation (100 kg N/ha)<br>2020/8/19 harvest<br>2020/9/1 last cut, biomass left on the field                                                                                                                                         | 2020/5/27: fertilisation (16 kg N/ha)                                            |                    |
| 2021 | 2021/5/12 fertilisation (80 kg N/ha)<br>2021/6/9 harvest + 2021/6/11 fertilisation (80 kg N/ha)<br>2021/7/12 harvest and 2021/7/28 fertilisation (40 kg N/ha)<br>2021/8/30 harvest                                                                                                                       |                                                                                  | 2021/2/22: harvest |
| 2022 | 2022/5/16 fertilisation (80 kg N/ha)<br>2022/5/31 Spot sowing (15kg/ha) with seed mix of <i>Phleum pratense</i> , <i>Festuca pratensis</i> , <i>Lolium multiflorum</i> and <i>Poa pratensis</i> .<br>2022/6/16 harvest<br>2022/7/28 harvest and 2022/8/1 fertilisation (40 kg N/ha)<br>2022/9/20 harvest |                                                                                  |                    |
| 2023 |                                                                                                                                                                                                                                                                                                          |                                                                                  | 2023/2/28: harvest |

\*Planted for bog whortleberry in the first year but turned to set-aside later.

**Table S2:** Fitted model parameters ( $\pm$ SE) for the estimation of gross photosynthesis (GP) and ecosystem respiration (ER).  $A_{\max}$  is asymptotic maximum ( $\text{g CO}_2 \text{ m}^{-2} \text{ h}^{-1}$ ),  $k$  is half-saturation value ( $\mu\text{mol photon m}^{-2} \text{ s}^{-1}$ )  $n$  is average number of observations in individual model.  $R0_s$  and  $R0_p$  are soil respiration and plant respiration at the reference temperature at  $10^\circ\text{C}$ ,  $E_s$  is ecosystem sensitivity,  $b(\text{WTD})$  is coefficient for water table level. Each combination of treatment and year contains results from four plots except forage in 2021, in which one plot was discarded due to poor model performance.

|    | <b>Year</b> | <b>Treatment</b> | <b><math>A_{\max}</math></b> | <b><math>k</math></b>    | <b><math>n</math></b>   | <b><math>R^2</math></b>           |                               |                       |                         |
|----|-------------|------------------|------------------------------|--------------------------|-------------------------|-----------------------------------|-------------------------------|-----------------------|-------------------------|
| GP | 2019        | Set-aside        | 1.6 (0.3)                    | 370 (130)                | 30                      | 0.30 (0.12)                       |                               |                       |                         |
|    |             | Forage           | 5.3 (0.5)                    | 870 (180)                | 35                      | 0.88 (0.002)                      |                               |                       |                         |
|    | 2020        | Set-aside        | 4.3e11                       | 1.0e14                   | 8                       | 0.75 (0.06)                       |                               |                       |                         |
|    |             | Forage           | 7.2 (1.6)                    | 970 (340)                | 42                      | 0.80 (0.02)                       |                               |                       |                         |
|    | 2021        | Set-aside        | 7.5 (2.4)                    | 2000 (820)               | 45                      | 0.65 (0.08)                       |                               |                       |                         |
|    |             | Forage           | 3.5 (0.2)                    | 280 (70)                 | 45                      | 0.58 (0.08)                       |                               |                       |                         |
|    | 2022        | Set-aside        | 5.4 (0.6)                    | 400 (100)                | 72                      | 0.87 (0.04)                       |                               |                       |                         |
|    |             | Forage           | 5.2 (0.4)                    | 380 (46)                 | 70                      | 0.91 (0.02)                       |                               |                       |                         |
|    | <b>Year</b> | <b>Treatment</b> | <b><math>R0_s</math></b>     | <b><math>R0_p</math></b> | <b><math>E_s</math></b> | <b><math>b(\text{WTD})</math></b> | <b><math>b</math> p-value</b> | <b><math>n</math></b> | <b><math>R^2</math></b> |
| ER | 2019        | Set-aside        | 0.31 (0.14)                  | 0.28 (0.21)              | 780 (380)               | -0.06 (0.09)                      | 0.45 (0.17)                   | 30                    | 0.74 (0.07)             |
|    |             | Forage           | 0.41 (0.06)                  | 0.42 (0.08)              | 360 (30)                | -0.09 (0.09)                      | 0.80 (0.09)                   | 31                    | 0.81 (0.01)             |
|    | 2020        | Set-aside        | 0.29 (0.04)                  | 1.36 (0.43)              | 210 (50)                | 0.01 (0.19)                       | 0.45 (0.09)                   | 24                    | 0.84 (0.04)             |
|    |             | Forage           | -0.07 (0.10)                 | 0.83 (0.09)              | 740 (500)               | -1.2 (0.2)                        | 0.28 (0.15)                   | 34                    | 0.56 (0.04)             |
|    | 2021        | Set-aside        | 0.20 (0.06)                  | 0.51 (0.02)              | 450 (130)               | -0.44 (0.21)                      | 0.44 (0.19)                   | 31                    | 0.67 (0.01)             |
|    |             | Forage           | 0.26 (0.13)                  | 0.46 (0.12)              | 670 (180)               | -0.65 (0.11)                      | 0.13 (0.07)                   | 31                    | 0.68 (0.06)             |
|    | 2022        | Set-aside        | 0.21 (0.02)                  | 0.86 (0.09)              | 690 (20)                | -0.45 (0.14)                      | 0.43 (0.17)                   | 41                    | 0.82 (0.02)             |
|    |             | Forage           | 0.13 (0.09)                  | 0.67 (0.12)              | 360 (160)               | -0.82 (0.28)                      | 0.35 (0.13)                   | 40                    | 0.74 (0.02)             |

\*Due to poor growth on the set-aside plots in 2019 and 2020, only a few GP measurements were made in 2020.

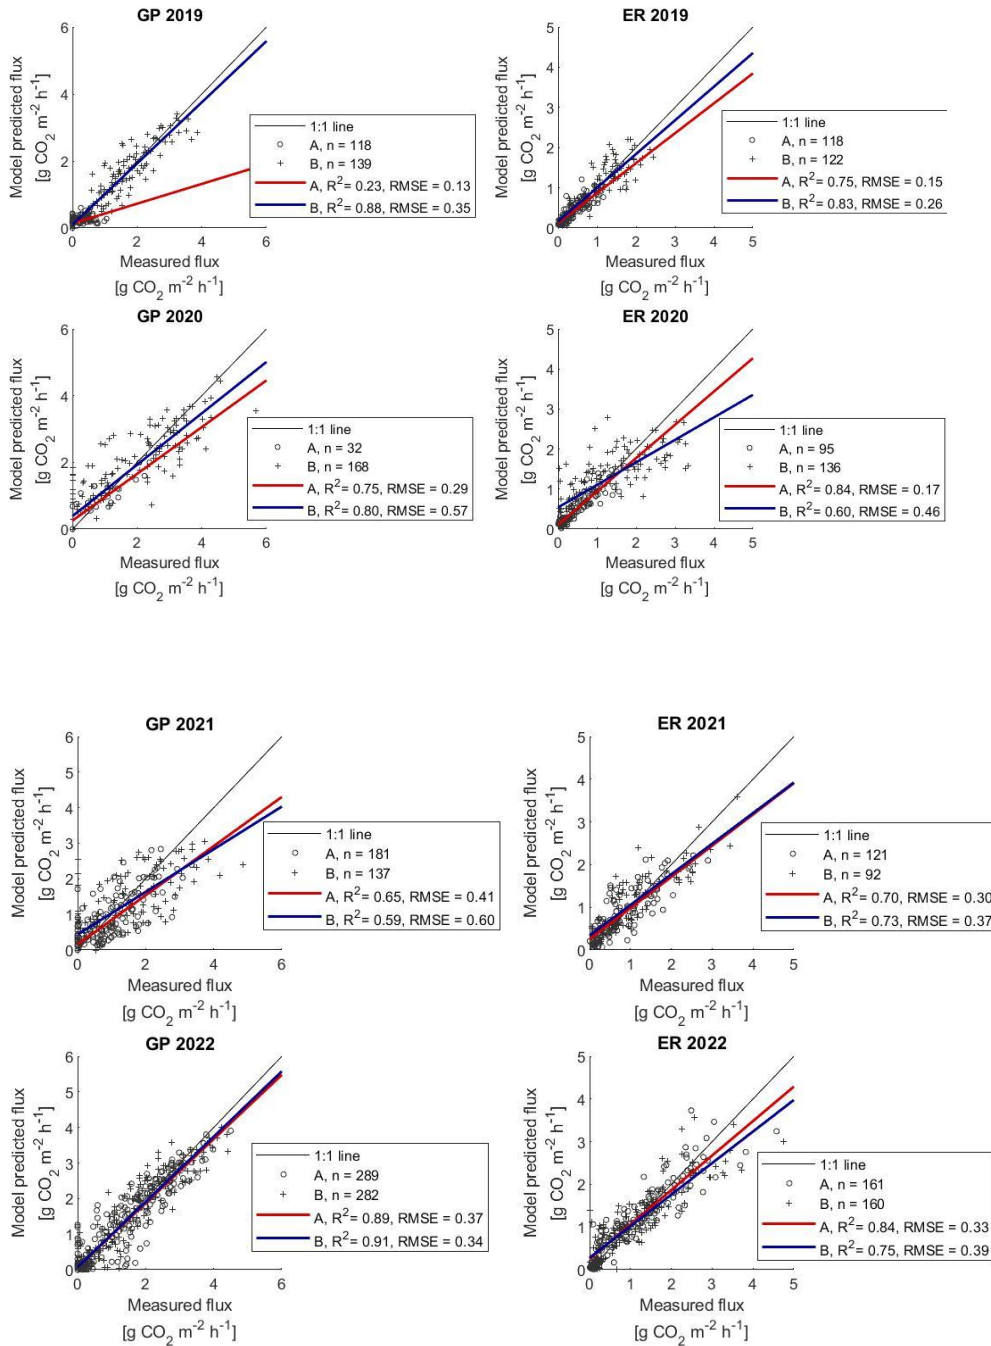

**Figure S1:** Comparisons between the measured and the model predicted values (g CO<sub>2</sub> m<sup>-2</sup> h<sup>-1</sup>) of gross photosynthesis (GP) and ecosystem respiration (ER) for the set-aside (A) and grass (B) treatments in 2018-2022. Outliers are excluded. Black lines represent the 1:1 line and the red and blue lines linear regression between the measured and modelled values.

**Table S3:** Model parameters for soil respiration

| <b>Year</b> | <b>Treatment</b> | <b>R0</b>   | <b>WTD</b>   | <b>R2</b>   |
|-------------|------------------|-------------|--------------|-------------|
| 2019        | Willow           | 0.92 (0.01) | 0.27 (0.02)  | 0.76 (0.02) |
|             | Set-aside        | 0.58 (0.05) | 0.10 (0.03)  | 0.67 (0.03) |
|             | Forage           | 0.70 (0.14) | 0.03 (0.10)  | 0.71 (0.05) |
| 2020        | Willow           | 0.44 (0.01) | -0.12 (0.03) | 0.71 (0.06) |
|             | Set-aside        | 0.38 (0.06) | -0.24 (0.10) | 0.47 (0.02) |
|             | Forage           | 0.34 (0.02) | -0.22 (0.20) | 0.53 (0.07) |
| 2021        | Willow           | 0.39 (0.07) | -0.28 (0.07) | 0.39 (0.05) |
|             | Set-aside        | 0.32 (0.07) | -0.70 (0.18) | 0.74 (0.03) |
|             | Forage           | 0.38 (0.11) | -0.15 (0.12) | 0.46 (0.08) |
| 2022        | Willow           | 0.20 (0.10) | -1.25 (0.39) | 0.71 (0.02) |
|             | Set-aside        | 0.20 (0.06) | -1.71 (0.30) | 0.45 (0.05) |
|             | Forage           | 0.03 (0.05) | -1.48 (0.14) | 0.43 (0.07) |

  

| <b>Year</b> | <b>Treatment</b> | <b>R0</b>   | <b>Es</b>  | <b>WTD</b>   | <b>n</b> | <b>R2</b>   |
|-------------|------------------|-------------|------------|--------------|----------|-------------|
| 2019        | Willow           | 0.68 (0.14) | 460 (80)   | -0.02 (0.19) | 22       | 0.76 (0.03) |
|             | Set-aside        | 0.28 (0.10) | 1000 (400) | -0.24 (0.07) | 18       | 0.68 (0.03) |
|             | Forage           | 0.55 (0.12) | 400 (30)   | -0.16 (0.07) | 18       | 0.71 (0.05) |
| 2020        | Willow           | 0.45 (0.05) | 310 (20)   | -0.11 (0.07) | 22       | 0.70 (0.06) |
|             | Set-aside        | 0.43 (0.11) | 300 (30)   | -0.11 (0.20) | 23       | 0.45 (0.03) |
|             | Forage           | 0.43 (0.10) | 310 (60)   | -0.05 (0.14) | 24       | 0.53 (0.08) |
| 2021        | Willow           | 0.22 (0.10) | 970 (360)  | -0.36 (0.07) | 19       | 0.51 (0.10) |
|             | Set-aside        | 0.18 (0.06) | 690 (110)  | -0.72 (0.16) | 18       | 0.80 (0.03) |
|             | Forage           | 0.17 (0.09) | 1500 (600) | -0.33 (0.12) | 17       | 0.68 (0.08) |
| 2022        | Willow           | 0.07 (0.07) | 470 (140)  | -1.48 (0.44) | 19       | 0.72 (0.02) |
|             | Set-aside        | 0.06 (0.01) | 610 (140)  | -1.96 (0.18) | 23       | 0.49 (0.06) |
|             | Forage           | 0.00 (0.02) | 830 (880)  | -1.55 (0.12) | 21       | 0.44 (0.08) |

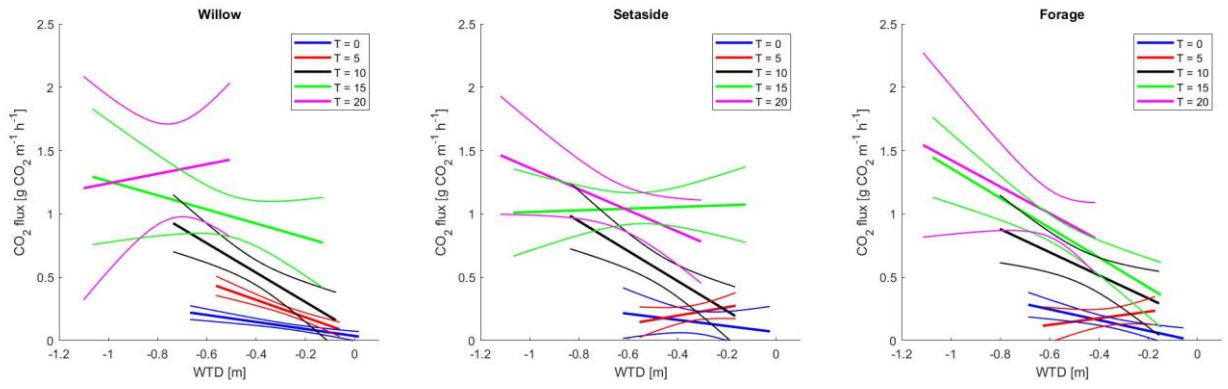

**Figure S2:** Bare soil respiration (with 95% confidence intervals) in relation to WTD in varying soil temperature conditions.
